# Supplementary material for: Safety and efficacy of bone marrow mononuclear cell therapy for ischemic stroke recovery: a systematic review and meta-analysis of randomized controlled trials
Source: Springer Nature journal article supplement (doi:10.1007/s10072-023-07274-x), 2024-01-03
Supplement: MOESM1 [file 10072_2023_7274_MOESM1_ESM.pdf]

**Safety and efficacy of bone marrow mononuclear cell therapy for ischemic stroke recovery: a systematic review and meta-analysis of randomized controlled trials**

Yanbing Tang<sup>#</sup>, Zilan Wang<sup>#</sup>, Haiying Teng, Hanyu Ni, Huiru Chen, Jiaye Lu, Zhouqing Chen<sup>\*</sup>, Zhong Wang<sup>\*</sup>

<sup>#</sup>Yanbing Tang and Zilan Wang contribute equally to this work.

<sup>\*</sup>Corresponding author: Zhouqing Chen or Zhong Wang, the First Affiliated Hospital of Soochow University, 188 Shizi Street, Suzhou, Jiangsu Province, 215006, China. E-mail address: zqchen6@163.com or wangzhong761@163.com.

## **Table S1: Search strategies and results**

### **Database1 MEDLINE**

("stem cell"[Title/Abstract] OR "stem cells"[Title/Abstract] OR "bone marrow mononuclear cell"[Title/Abstract]) AND "stroke"[Title/Abstract] AND "random\*"[Title/Abstract]

### **Database2 EMBASE**

#1 'stem cell':ti,ab,kw OR 'stem cells':ti,ab,kw OR 'bone marrow mononuclear cell ':ti,ab,kw

#2 stroke:ti,ab,kw

#3 random\*:ti,ab,kw

#4 #1 AND #2 AND #3

### **Database3 Cochrane**

#1 ((TS=(stem cell)) OR TS=(stem cells)) OR TS=(bone marrow mononuclear cell)

#2 TS=(stroke)

#3 TS=(random\*)

#4 #3 AND #2 AND #1

### **Clinicaltrial.gov**

- Condition or disease: stroke
- Other terms: stem cell OR stem cells OR bone marrow mononuclear cell OR bone marrow mononuclear cells
